# Supplementary material for: Thermally tunable anti-ambipolar heterojunction devices
Source: Royal Society of Chemistry journal article supplement (doi:10.1039/d4cp02937b), 2024-01-01
Supplement: d4cp02937b1.pdf [file d4cp02937b1.pdf]

## Electronic Supplementary Material

### Thermally tunable anti-ambipolar heterojunction devices

Shengyao Chen,<sup>‡,ab</sup> Jiyou Jin,<sup>‡,b</sup> Wenxiang Wang,<sup>‡,b</sup> Shu Wang,<sup>b</sup> Xiaoshan Du,<sup>b</sup> Feng Wang,<sup>cd</sup> Lijun Ma,<sup>b</sup> Junqi Wang,<sup>b</sup> Cong Wang,<sup>\*c</sup> Xinzheng Zhang,<sup>\*a</sup> and Qian Liu<sup>\*ab</sup>

<sup>a</sup>MOE Key Laboratory of Weak-Light Nonlinear Photonics, TEDA Institute of Applied Physics, School of Physics, Nankai University, Tianjin 300457, China. E-mail: [zxz@nankai.edu.cn](mailto:zxz@nankai.edu.cn), [liuq@nanoctr.cn](mailto:liuq@nanoctr.cn).

<sup>b</sup>CAS Center for Excellence in Nanoscience, National Center for Nanoscience and Technology & University of Chinese Academy of Sciences, Beijing 100190, China.

<sup>c</sup>CAS Key Laboratory of Nanosystem and Hierarchical Fabrication, National Center for Nanoscience and Technology, Beijing 100190, China.

<sup>d</sup>Center of Materials Science and Optoelectronics Engineering, University of Chinese Academy of Sciences, Beijing 100049, China.

<sup>e</sup>College of Mathematics and Physics, Beijing University of Chemical Technology, Beijing 100029, China.

E-mail: [wangcongphysics@mail.buct.edu.cn](mailto:wangcongphysics@mail.buct.edu.cn), [zxz@nankai.edu.cn](mailto:zxz@nankai.edu.cn), [liuq@nanoctr.cn](mailto:liuq@nanoctr.cn).

Sheng-yao Chen, Ji-you Jin, Wen-xiang Wang have contributed equally to this work.

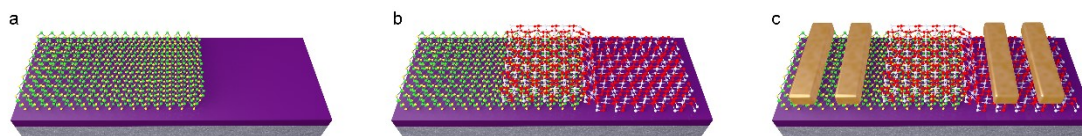

Fig.S1 Preparation process diagram of anti-ambipolar heterojunction devices (a) Transfer few-layers  $\text{As}_{0.4}\text{P}_{0.6}$  onto  $\text{SiO}_2$  (285 nm)-Si substrate. (b) Transfer few-layers  $\text{PdSe}_2$  onto  $\text{As}_{0.4}\text{P}_{0.6}$ . (c) fabricate Cr/Au electrodes onto the heterojunction.

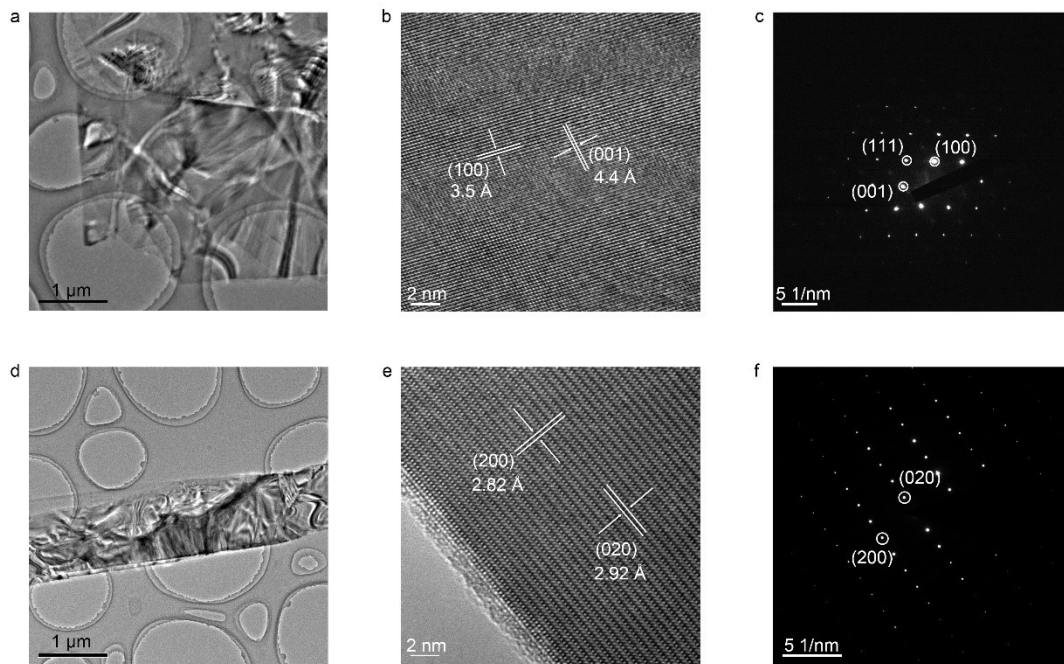

Fig.S2 (a-c) The transmission electron microscopy image of few-layers  $\text{As}_{0.4}\text{P}_{0.6}$ . (d-f) the transmission electron microscopy image of few-layers  $\text{PdSe}_2$

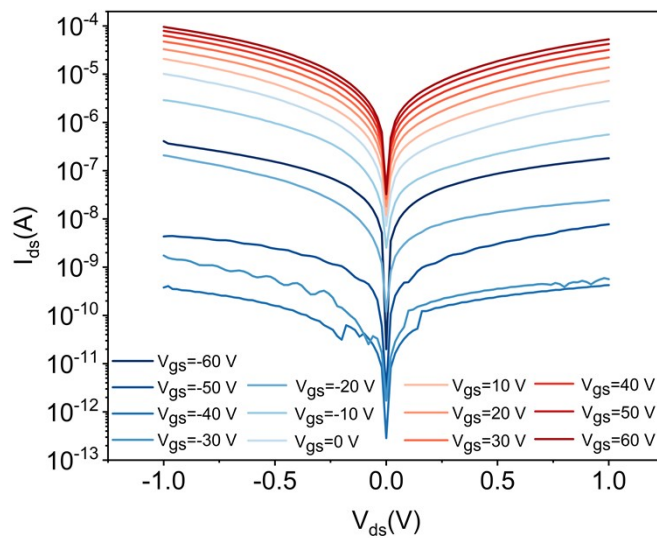

Fig.S3 The output characteristic curve of  $\text{PdSe}_2$  at room temperature under different gate voltage (from -60 V- 60 V)

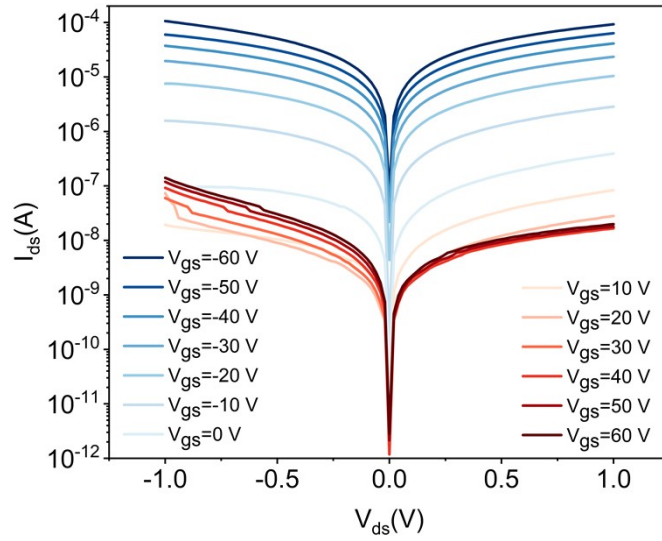

Fig.S4 The output characteristic curve of  $\text{As}_{0.4}\text{P}_{0.6}$  at room temperature under different gate voltage (from -60 V- 60 V)

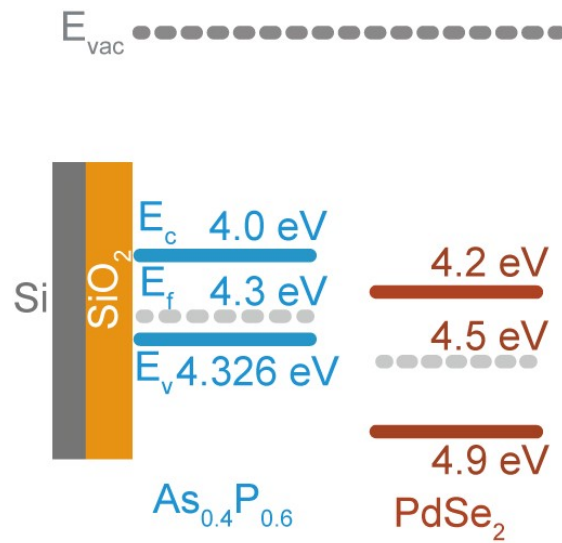

Fig.S5 Band diagram of the  $\text{As}_{0.4}\text{P}_{0.6}/\text{PdSe}_2$  heterojunction before contact.
